# Supplementary material for: BCAS2 promotes prostate cancer cells proliferation by enhancing AR mRNA transcription and protein stability
Source: PubMed Central journal article supplement — Br J Cancer. 2014 Dec 2;112(2):391–402. doi: 10.1038/bjc.2014.603 (PMC4453457; doi:10.1038/bjc.2014.603), 2014-12-02
Supplement: bjc2014603x1.pdf [file bjc2014603x1.pdf]

## Supplementary Figure 1

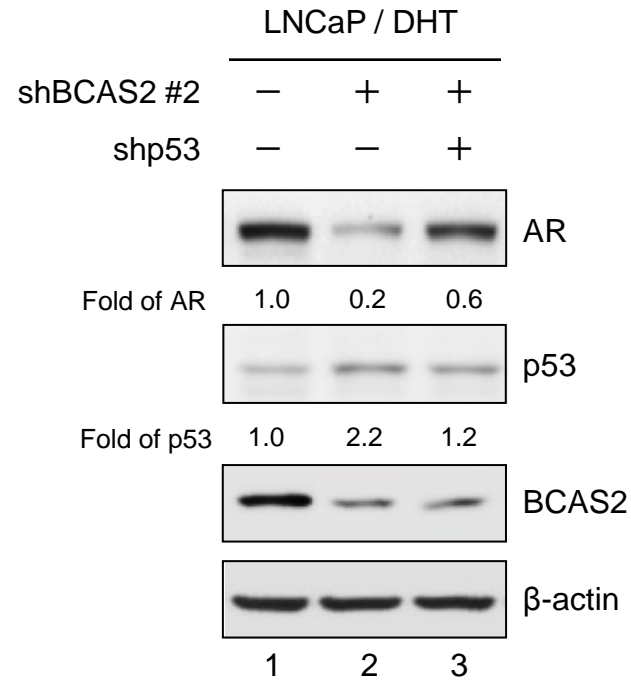

**Supplementary Figure 1.** Depletion of BCAS2 decreases AR through a p53-dependent pathway. In the presence of DHT, LNCaP cells transfected with shBCAS2#2 along, with shp53 or shCtrl, were subjected to western blotting with the antibodies indicated.

## Supplementary Figure 2

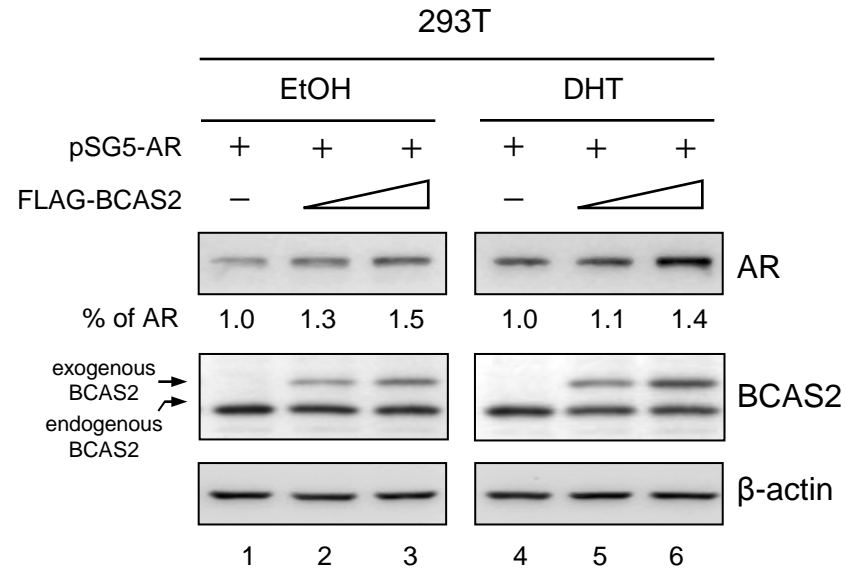

**Supplementary Figure 2.** BCAS2 enhances AR protein expression in 293T cells. 293T cells (p53 is blocked by SV40 T Ag) were transiently transfected with pSG5-AR (AR gene expression driven by a heterologous SV40 promoter) along with increasing doses of FLAG-BCAS2 plasmid. The expression levels of AR protein were quantified by UVP BioSpectrum-AC imaging software and data were normalized to  $\beta$ -actin.

## Supplementary Figure 3

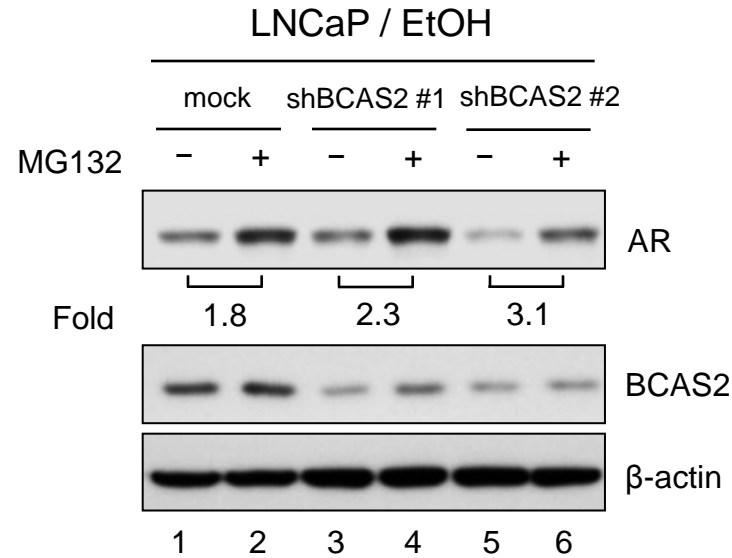

**Supplementary Figure 3.** BCAS2 protects AR from proteasome degradation without ligand treatment. LNCaP cells transfected with shCtrl, shBCAS2#1 or shBCAS2#2 were treated with MG132 (20  $\mu$ M) or DMSO in the absence of ligand. The levels of AR protein were quantified by UVP BioSpectrum-AC imaging software and data were normalized to  $\beta$ -actin. The fold of increase in AR level were indicated.

## Supplementary Figure 4

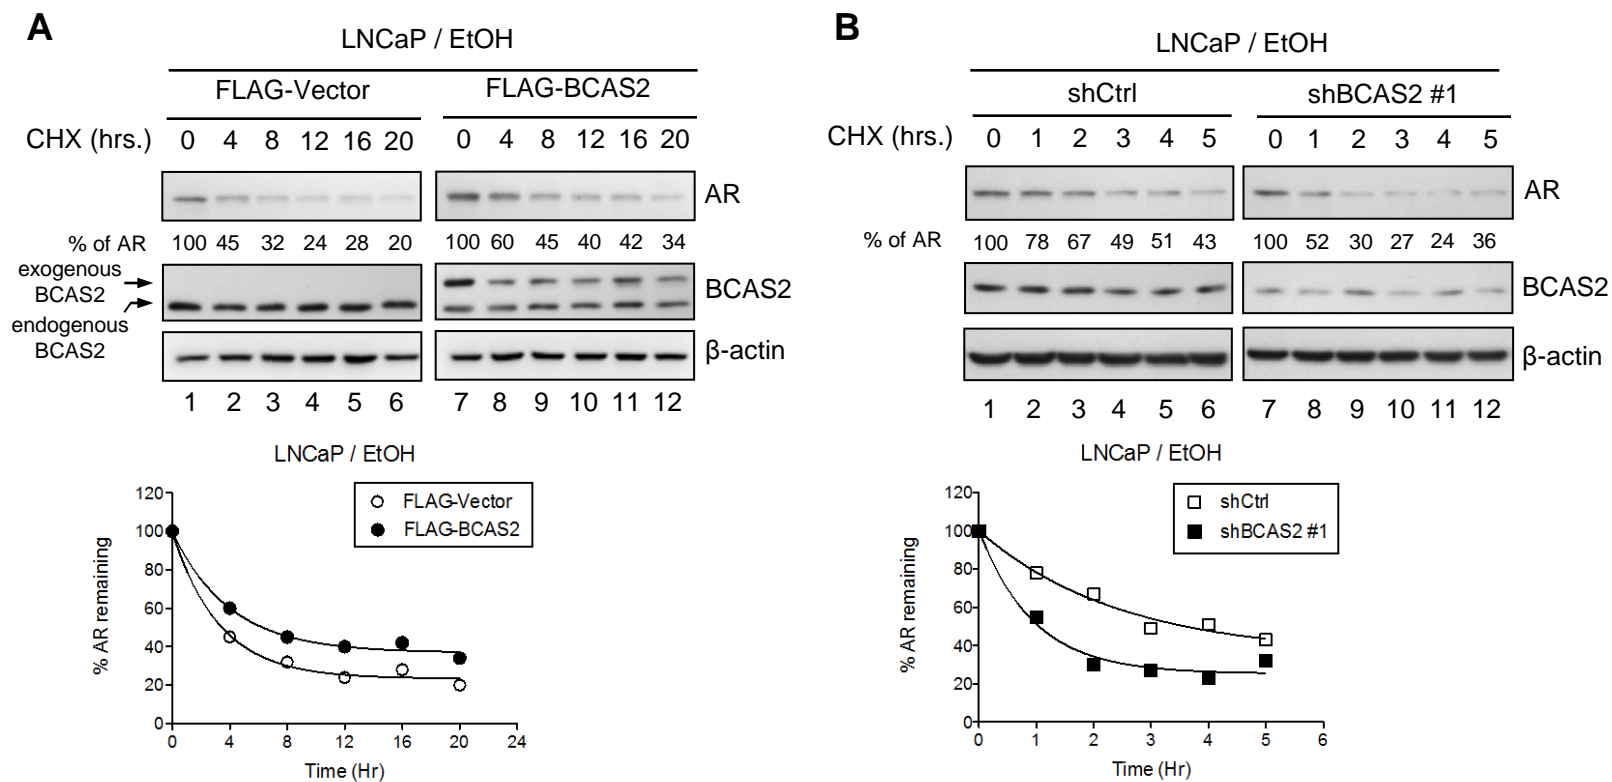

**Supplementary Figure 4.** BCAS2 enhances AR protein stability without ligand treatment. **(A)** Overexpression of BCAS2 increases AR protein stability. In the absence of DHT, LNCaP cells transfected with FLAG-BCAS2 or FLAG-Vector were incubated with CHX (200  $\mu$ g/ml) for the times indicated. The levels of AR protein were quantified using UVP BioSpectrum-AC imaging software and data were normalized to  $\beta$ -actin. The % of AR indicates the amount of AR at each time point, relative to the control (time 0 set as 100%). Upper panel, Western blot. Lower panel, the calculated regression curves. **(B)** Depletion of BCAS2 reduces AR protein stability. LNCaP cells transfected with shCtrl or shBCAS2#1 in the absence of ligand were subjected to CHX-chase assay as described in panel A.

## Supplementary Figure 5

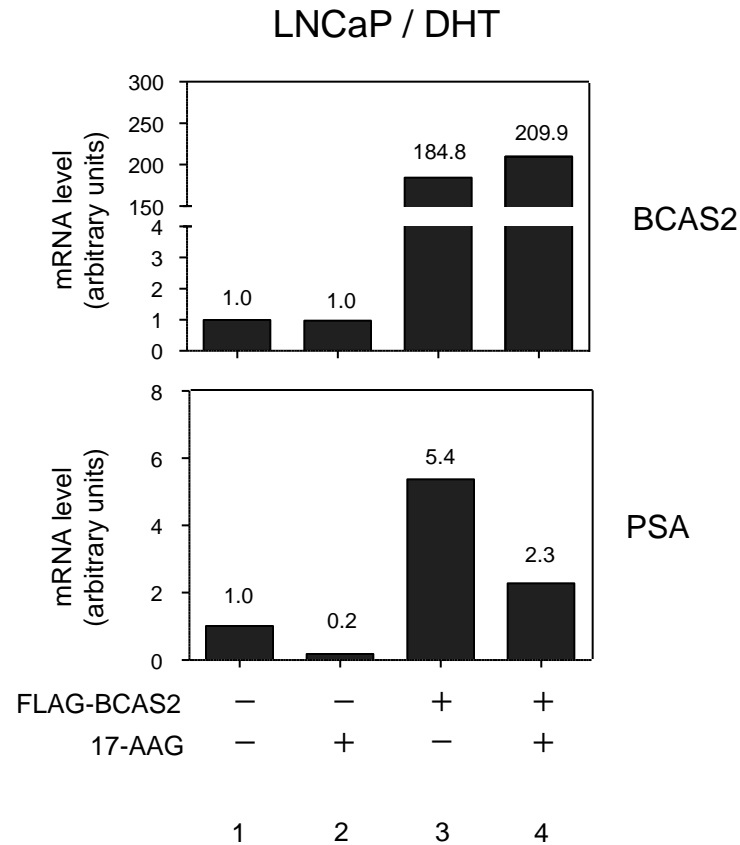

**Supplementary Figure 5.** Overexpression of BCAS2 restores PSA expression level from 17-AAG treatment in LNCaP cells. LNCaP cells transfected with FLAG-BCAS2 were treated with 17-AAG (0.2  $\mu$ M) in the presence of DHT. BCAS2 and PSA mRNA levels were determined by qPCR.

## Supplementary Figure 6

**A**

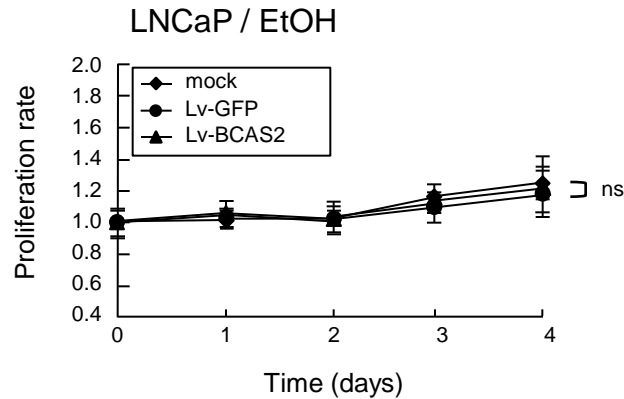

**B**

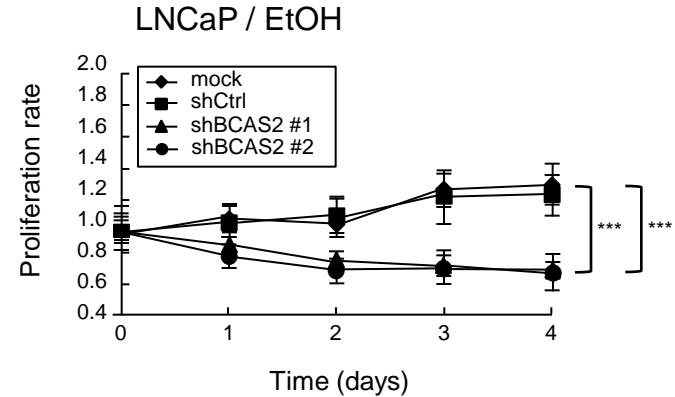

**Supplementary Figure 6.** BCAS2 affects the LNCaP cell growth rate without ligand treatment (**A**) Overexpressed BCAS2 cannot alter the growth rate of AR-containing prostate cancer cells without ligand treatment. LNCaP cells infected with Lv-BCAS2 or Lv-GFP virus were growth in phenol red-free RPMI medium containing 5% CDS with EtOH treatment. The growth rates of LNCaP cells were counted using the MTT assay method. ns, no significance, Student's *t*-test. (**B**) Depletion of BCAS2 reduces the growth rate of AR-containing prostate cancer cells without ligand treatment. The growth rates of LNCaP cells transfected with shBCAS2#1, shBCAS2#2, or shCtrl plasmids were also determined using MTT assay. Means are shown from three independent experiments. \*\*\*: Student's *t*-test,  $p < 0.001$ .

# Supplementary Table 1

**Supplementary Table 1.** Identification of a new siRNA construct against BCAS2

| Target Sequence for BCAS2 RNAi Constructs |                           |                    |
|-------------------------------------------|---------------------------|--------------------|
| shBCAS2#2                                 | 5'-AGACTGGCTGCTCGACAAC-3' | Position 214 – 232 |
| shCtrl                                    | 5'-CATGCCTGATCCGCTAGTC-3' | –                  |

## Supplementary Table 2

**Supplementary Table 2.** Real-time PCR primers used in this study.

---

| Primers for Real-time PCR |                                                                 |
|---------------------------|-----------------------------------------------------------------|
| AR                        | F 5'-GGAATTCCTGTGCATGAAA-3'<br>R 5'-CGAAGTTCATCAAAGAATT-3'      |
| BCAS2                     | F 5'-CACAGCATGGATGTAATGCC-3'<br>R 5'-TCCAGCTGTGAGTTGCATGT-3'    |
| PSA                       | F 5'-AGACACTCACAGCAAGGATGGA-3'<br>R 5'-CTCCTTGGCTCACAGCCTTCT-3' |
| GAPDH                     | F 5'-TGCACCACCAACTGCTTAGC-3'<br>R 5'-GGCATGGACTGTGGTCATGAG-3'   |

---
